# Supplementary material for: Antimicrobial and Mechanical Properties of Ag@Ti3C2Tx-Modified PVA Composite Hydrogels Enhanced with Quaternary Ammonium Chitosan
Source: MDPI journal article supplement (doi:10.3390/polym15102352), 2023-05-18
Supplement: s1 [file s1]

## Supplementary Materials

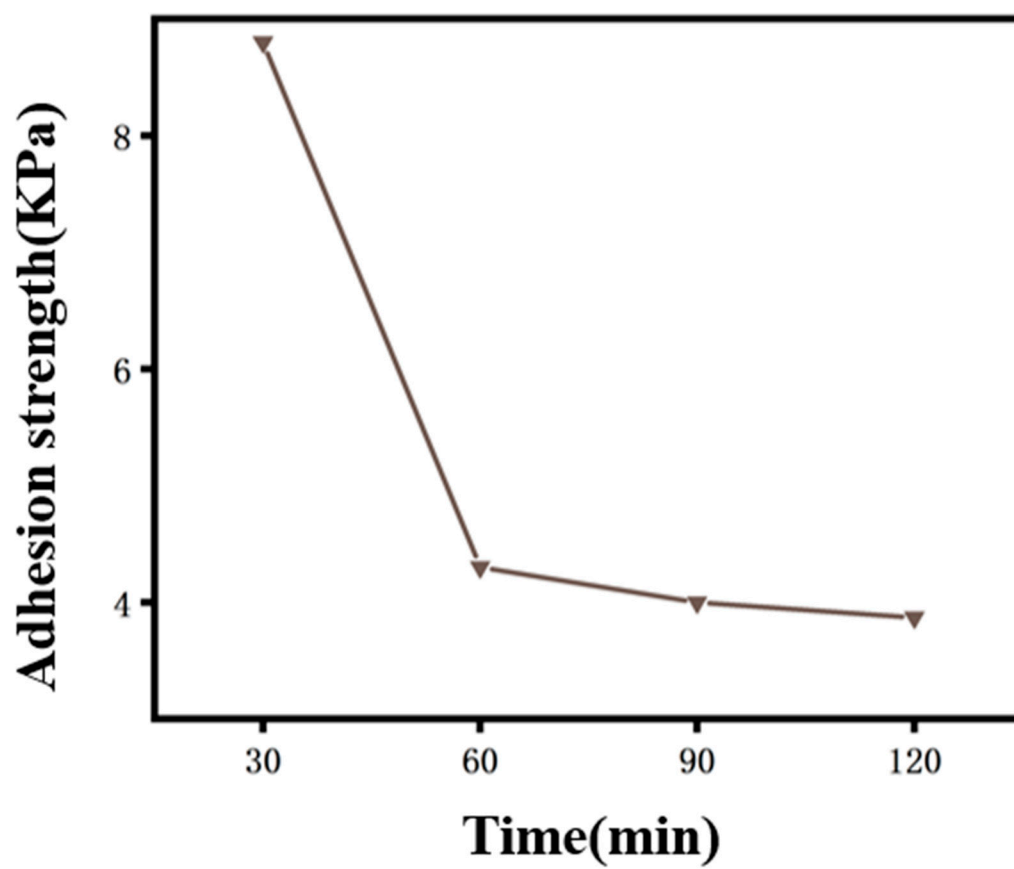

**Figure S1.** Time-adhesion strength curves of Ag@M-H-PVA hydrogels (Ag@M3wt%, HACCC9wt%) under wet conditions.
